# Supplementary material for: Riverine Health Assessment Using Coordinated Development Degree Model Based on Natural and Social Functions in the Lhasa River, China
Source: MDPI journal article supplement (doi:10.3390/ijerph19127182), 2022-06-11
Supplement: s1 [file s1]

**Table S1.** Index description and calculation methods of Lhasa River health assessments.

| Index name |                              | Index interpretation                                                                                                                                 | Calculation method                                                                                                                                                                                                                                                                                                                                                                                                                                 |
|------------|------------------------------|------------------------------------------------------------------------------------------------------------------------------------------------------|----------------------------------------------------------------------------------------------------------------------------------------------------------------------------------------------------------------------------------------------------------------------------------------------------------------------------------------------------------------------------------------------------------------------------------------------------|
| C1         | Flow deviation               | C1 represents the deviation between measured runoff and natural runoff, mainly affected by the development and utilization of basin water resources. | $C1 = \sqrt{\sum_{m=1}^{12} \left( \frac{q_m - Q_m}{Q_a} \right)^2}$ , $Q_a = \frac{1}{12} \sum_{m=1}^{12} Q_m$ , where $q_m$ is the measured monthly runoff, m <sup>3</sup> ; $Q_m$ is the natural monthly runoff, m <sup>3</sup> ; $Q_a$ is the annual average natural monthly runoff, m <sup>3</sup> .                                                                                                                                          |
| C2         | Ecological flow satisfaction | C2 is the minimum runoff required to maintain the survival and population structure of fish and aquatic plants.                                      | $C2 = \min(EF_1, EF_2)$ , $EF_1 = \min \left[ \frac{q_d}{Q} \right]_{m=4}^9$ , $EF_2 = \min \left[ \frac{q_d}{Q} \right]_{m=10}^3$ , where $EF_1$ and $EF_2$ represent environmental discharge guarantee degree in spawning period (from April to September) and normal period (from October to March); $q_d$ is the measured daily runoff, m <sup>3</sup> ; $Q$ is the average annual runoff, m <sup>3</sup> .                                    |
| C3         | Riparian status              | C3 is a comprehensive index comprising of bank stability, fractional vegetation cover and riparian disturbance.                                      | Riverbank stability is related to slope inclination, altitude, material, and erosion intensity. Fractional vegetation cover refers to the percentage of the vertical projection area of vegetation on the ground to the total statistical area. Riparian disturbance refers to the negative impact of human activities on riparian, including sand mining, coastal buildings, railways, landfills, pipelines, cultivation, and livestock breeding. |
| C4         | River connectivity           | C4 mainly evaluates the blockage of fish migration, water flow, and nutrient transfer.                                                               | C4 is obtained according to the number of buildings or facilities affecting river connectivity per unit river length (100 km).                                                                                                                                                                                                                                                                                                                     |
| C5         | Wetland retention            | C5 is the ratio of natural wetland area in assessment year to historical wetland area. This                                                          | $C5 = AWA/HWA$ , where $AWA$ is natural wetland area in assessment year, km <sup>2</sup> ; and $HWA$ is natural wetland area in 1950, km <sup>2</sup> .                                                                                                                                                                                                                                                                                            |

| Index name                | Index interpretation                                                                                                                                                                                | Calculation method                                                                                                                                                                      |
|---------------------------|-----------------------------------------------------------------------------------------------------------------------------------------------------------------------------------------------------|-----------------------------------------------------------------------------------------------------------------------------------------------------------------------------------------|
|                           | paper selects 1950 as the historical year, which before exclusive urbanization development.                                                                                                         |                                                                                                                                                                                         |
| C6 DO concentration       | C6 refers to dissolved oxygen concentration in water.                                                                                                                                               | $C6 = DO_r$ , where $DO_r$ indicates dissolved oxygen concentration.                                                                                                                    |
| C7 Nutrient concentration | C7 is the score of organic pollutants including permanganate index ( $COD_{Mn}$ ), chemical oxygen demand (COD), five-day biochemical oxygen demand ( $BOD_5$ ), and ammonia nitrogen ( $NH_3-N$ ). | $C7 = \min(COD_{Mn_r}, COD_r, BOD_r, NH_3N_r)$ , where $COD_{Mn_r}$ , $COD_r$ , $BOD_r$ and $NH_3N_r$ are the concentration of $COD_{Mn}$ , COD, $BOD_5$ , and $NH_3-N$ , respectively. |
| C8 Heavy metal pollutants | C8 refers to the water pollution by heavy metal pollutants and compounds with biological toxicity, such as mercury (Hg), cadmium (Cd), chromium (Cr), lead (Pb) and arsenic (As).                   | $C8 = \min(Hg_r, Cd_r, Cr_r, Pb_r, As_r)$ , where $Hg_r$ , $Cd_r$ , $Cr_r$ , $Pb_r$ , and $As_r$ are the concentration of Hg, Cd, Cr, Pb, and As, respectively.                         |
| C9 Biodiversity           | C9 evaluates environmental quality using Shannon-wiener biodiversity index.                                                                                                                         | $C9 = -\sum_{i=1}^S (n_i/N) \log_2 (n_i/N)$ , where $S$ is species numbers; $n_i$ is the number of individuals in one species; $N$ is the total number of individuals.                  |
| C10 Fish                  | C10 indicates the losses of fish in river ecosystems.                                                                                                                                               | $C10 = FA/FR$ , where $FA$ and $FR$ are the fish populations in assessment year and reference situation.                                                                                |
| C11 Flood control         | C11 indicates the current situation of flood storage area, dikes and river reconstruction in the river basin.                                                                                       | $C11 = RLS/RL$ , where $RLS$ is the length of river reach that meets the flood control requirements; $RL$ is the total length of river reach.                                           |

| Index name                     | Index interpretation                                                                                                                                                                                 | Calculation method                                                                                                                                              |
|--------------------------------|------------------------------------------------------------------------------------------------------------------------------------------------------------------------------------------------------|-----------------------------------------------------------------------------------------------------------------------------------------------------------------|
| C12 Water function zone        | C12 indicates the current situation of water quality in watershed water function regions.                                                                                                            | $C12 = NRS/NR$ , where $NRS$ is the number of water function regions that water quality attaining standard; $NR$ is the total number of water function regions. |
| C13 Water resource utilization | C13 expresses the influence of social activities on water quantity, reveals the coordination between socio-economic development and environmental protection.                                        | $C13 = WU/WR$ , where $WU$ and $WR$ are the water supply and total water resources, respectively.                                                               |
| C14 Water supply               | C14 is the ratio of total water supply to total water demand, which reflects the satisfaction degree of rivers to the water demand for the development of domestic economy in the surrounding areas. | $C14 = TS/TD$ , where $TS$ and $TD$ are the total water supply and water demand, respectively.                                                                  |
| C15 Hydropower development     | C15 refers to the ratio of developed installed capacity and potential hydropower resources.                                                                                                          | $C15 = IC/PH$ , where $IC$ and $PH$ are the developed installed capacity and potential hydropower resources, respectively.                                      |
| C16 Public satisfaction        | C16 refers to the public satisfaction with the assessment of river landscape and aesthetic value.                                                                                                    | C16 is obtained based on public participation survey statistics.                                                                                                |

**Table S2.** Index weights of the Lhasa River health assessment.

| Target layer     | Criterion layer            | Weight | Index layer                          |
|------------------|----------------------------|--------|--------------------------------------|
| Riverine health  | Hydrology                  | 0.147  | Flow deviation (0.054)               |
|                  |                            |        | Ecological flow satisfaction (0.093) |
|                  | Physical form              | 0.164  | Riparian status (0.056)              |
|                  |                            |        | River connectivity (0.057)           |
|                  |                            |        | Wetland retention (0.051)            |
|                  | Water quality              | 0.161  | DO concentration (0.053)             |
|                  |                            |        | Nutrient concentration (0.057)       |
|                  |                            |        | Heavy metal pollutants (0.051)       |
|                  | Aquatic life               | 0.195  | Biodiversity (0.120)                 |
|                  |                            |        | Fish losses (0.075)                  |
| Social functions | Flood control function     | 0.063  | Flood control (0.063)                |
|                  | Loading pollutant function | 0.051  | Water function zone (0.051)          |
|                  | Water supply function      | 0.163  | Water resources utilization (0.058)  |
|                  |                            |        | Water supply guarantee (0.052)       |
|                  | Landscape function         | 0.057  | Hydropower development (0.052)       |
|                  |                            |        | Public satisfaction (0.057)          |
